# Supplementary material for: Pesticide analysis using nanoceria-coated paper-based devices as a detection platform
Source: Royal Society of Chemistry journal article supplement (doi:10.1039/c5an02403j), 2016-01-01
Supplement: c5an02403j1.pdf [file c5an02403j1.pdf]

## Supporting information for

### *Pesticide analysis using nanoceria-coated paper-based devices as a detection platform*

Souksanh Nouanthavong<sup>a,b</sup>, Duangjai Nacapricha<sup>c</sup>, Charles S. Henry<sup>d</sup>, Yupaporn Sameenoi<sup>a\*</sup>

<sup>a</sup>Department of Chemistry, Faculty of Science, Burapha University, Chon Buri, 20131, Thailand

<sup>b</sup>Savannakhet Teacher Training College, Savannakhet, Lao PDR

<sup>c</sup>Department of Chemistry and Center of Excellence for Innovation in Chemistry, Faculty of Science, Mahidol University, Bangkok, 10400, Thailand

<sup>d</sup>Department of Chemistry, Colorado State University, Fort Collins, 80523-1872, USA

## Cost estimation of the developed device

TableS1 Cost of patterned paper based device

| Item                                        | For 15 pieces of circular Whatman # 4 filter paper (11 cm diameter) |            |
|---------------------------------------------|---------------------------------------------------------------------|------------|
|                                             | Unit                                                                | Price (\$) |
| Whatman # 4                                 | 15 pieces                                                           | 1.5        |
| Polystyrene                                 | 5 g                                                                 | 0.035      |
| Toluene                                     | 20 mL                                                               | 0.538      |
| Price per 15 pieces of circular Whatman # 4 |                                                                     | 2.073      |
| Price per one piece of circular Whatman # 4 |                                                                     | 0.138      |
| Price per one detection zone                |                                                                     | 0.0011     |

TableS2 Cost of key chemicals

| Item                                | Shipping |            | Assay                   |            |
|-------------------------------------|----------|------------|-------------------------|------------|
|                                     | Unit     | Price (\$) | Unit                    | Price (\$) |
| AChE (518 U/mg Solid, 3.9 mg Solid) | 2020 U   | 90.72      | $5 \times 10^{-3}$ U    | 0.0002     |
| Acetylcholine chloride              | 25 g     | 68.49      | $2.72 \times 10^{-6}$ g | 0.0000074  |
| ChOX (13 U/mg Solid, 8 mg Solid)    | 104 U    | 136        | $25 \times 10^{-3}$ U   | 0.032      |
| Cerium (IV) oxide (20%w/v, 500 mL)  | 100 g    | 297.47     | $15 \times 10^{-5}$ g   | 0.00044    |
| Price per one detection zone        |          |            |                         | 0.033      |

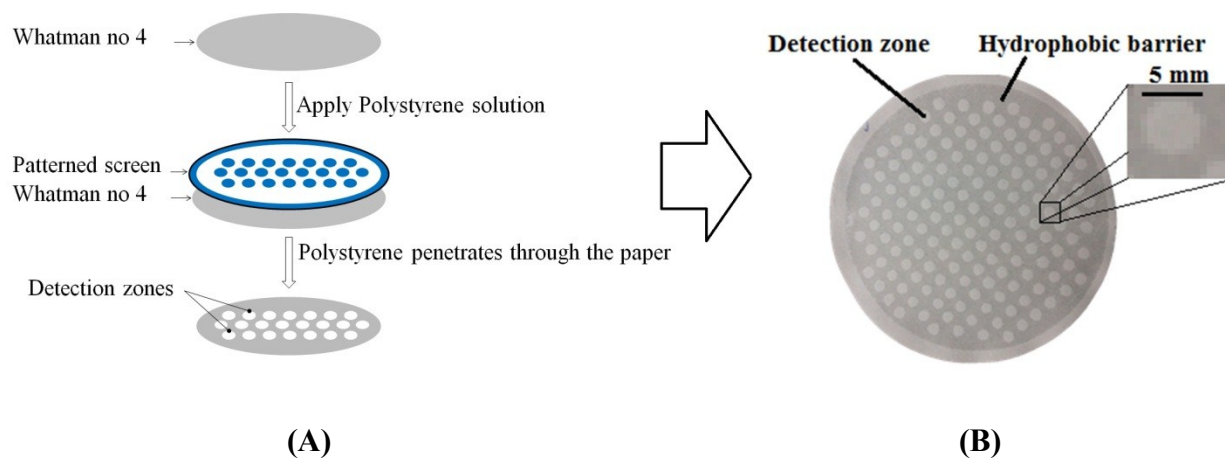

**Figure S1** (A) The steps for fabrication of paper-based device and (B) A paper-based device used in this work.

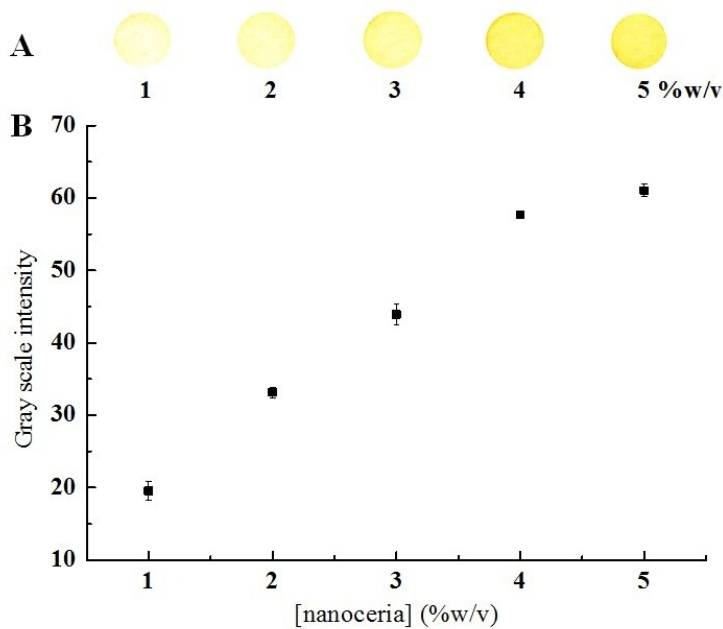

**Figure S2** (A) Colorimetric response of CeO<sub>2</sub>-coated paper-based device with concentration range of 1 to 5 % (w/v) for the analysis of 100 mM H<sub>2</sub>O<sub>2</sub>. (B) Plot of mean grey intensity as a function of CeO<sub>2</sub> NPs concentrations.

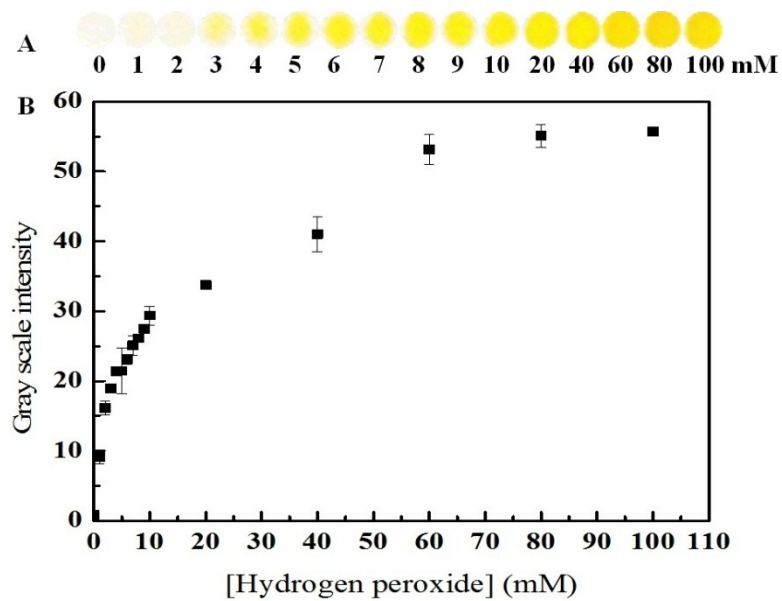

**Figure S3** The colorimetric assay of nanoceria-coated paper-based device for the analysis of H<sub>2</sub>O<sub>2</sub>.

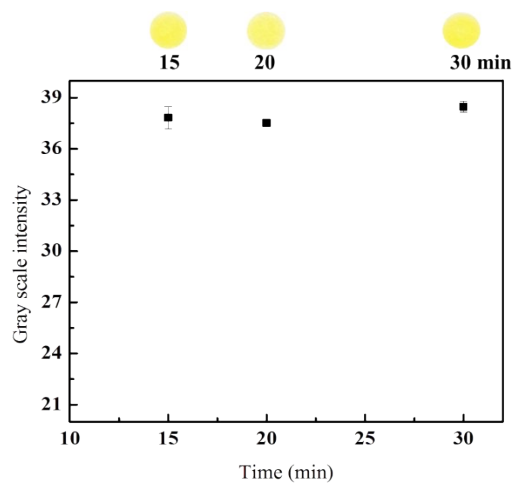

**Figure S4** Reaction time optimization study.
